# Supplementary material for: MnOx–CeO2 supported on a three-dimensional and networked SBA-15 monolith for NOx-assisted soot combustion
Source: Royal Society of Chemistry journal article supplement (doi:10.1039/c3ra47749e), 2014-01-01
Supplement: c3ra47749e1.pdf [file c3ra47749e1.pdf]

## Supporting Information

### **MnO<sub>x</sub>-CeO<sub>2</sub> supported on a three-dimensional and networked SBA-15 monolith for NO<sub>x</sub>-assisted soot combustion**

Hui Zhang<sup>a,b</sup>, Fangna Gu<sup>b,\*</sup>, Qing Liu<sup>b</sup>, Jiajian Gao<sup>b</sup>,

Lihua Jia<sup>a,\*</sup>, Tingyu Zhu<sup>b</sup>, Yunfa Chen<sup>b</sup>, Ziyi Zhong<sup>c</sup>, and Fabing Su<sup>b,\*</sup>

<sup>a</sup> *College of Chemistry and Chemical Engineering, Qiqihaer University, Qiqihaer, Heilongjiang Province, China 161006*

<sup>b</sup> *State Key Laboratory of Multiphase Complex Systems, Institute of Process Engineering, Chinese Academy of Sciences, Beijing, China 100190*

<sup>c</sup> *Institute of Chemical Engineering and Sciences, A\*star, 1 Pesek Road, Jurong Island, Singapore 627833*

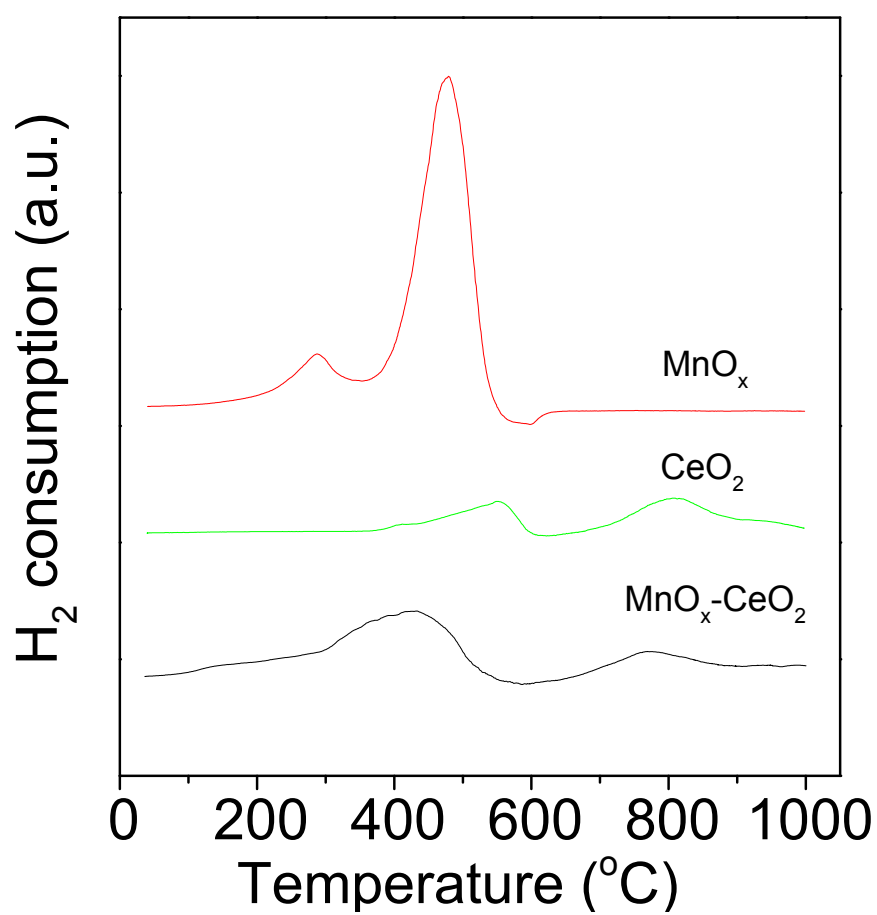

**Figure S1.** H<sub>2</sub>-TPR curves of MnO<sub>x</sub>, CeO<sub>2</sub>, and MnO<sub>x</sub>-CeO<sub>2</sub>.

**Table S1.** Stability test of 4-MnCe/SM for soot combustion for three test cycles.

| Test cycles <sup>a</sup> | $T_{10}$ (°C) | $T_{50}$ (°C) | $T_{90}$ (°C) | $S_{CO_2}$ (%) |
|--------------------------|---------------|---------------|---------------|----------------|
| 1                        | 287           | 382           | 431           | 100            |
| 2                        | 287           | 384           | 434           | 100            |
| 3                        | 289           | 383           | 434           | 100            |

<sup>a</sup>Reaction gas, 1000 ppm NO/10% O<sub>2</sub>/Ar, 50 mL min<sup>-1</sup>.

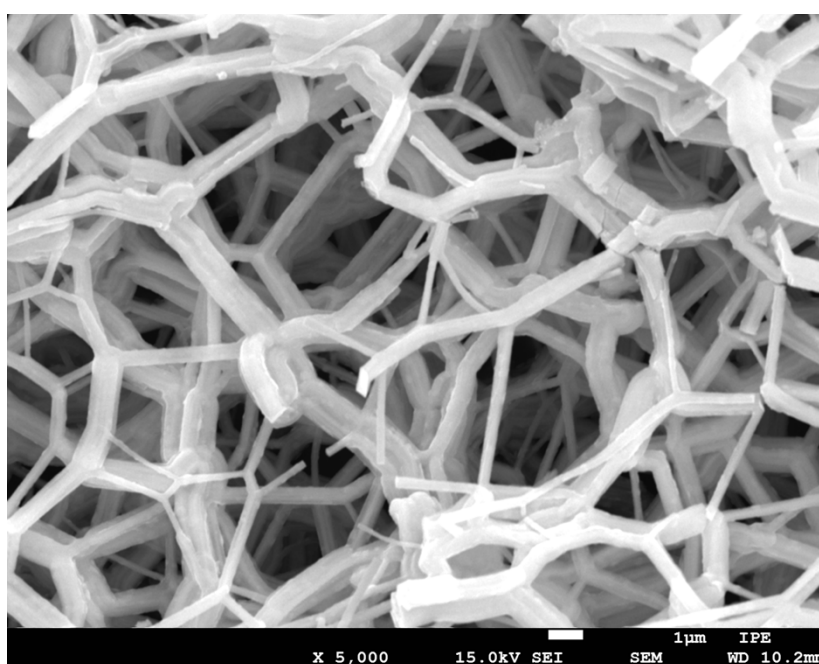

**Figure S2.** SEM image of 4-MnCe/SM after soot-TPO reaction for three cycles.
